# Supplementary material for: Identification of Prognostic Genes in Gliomas Based on Increased Microenvironment Stiffness
Source: MDPI journal article supplement (doi:10.3390/cancers14153659), 2022-07-27
Supplement: s1 [file s1]

## Supplementary Materials

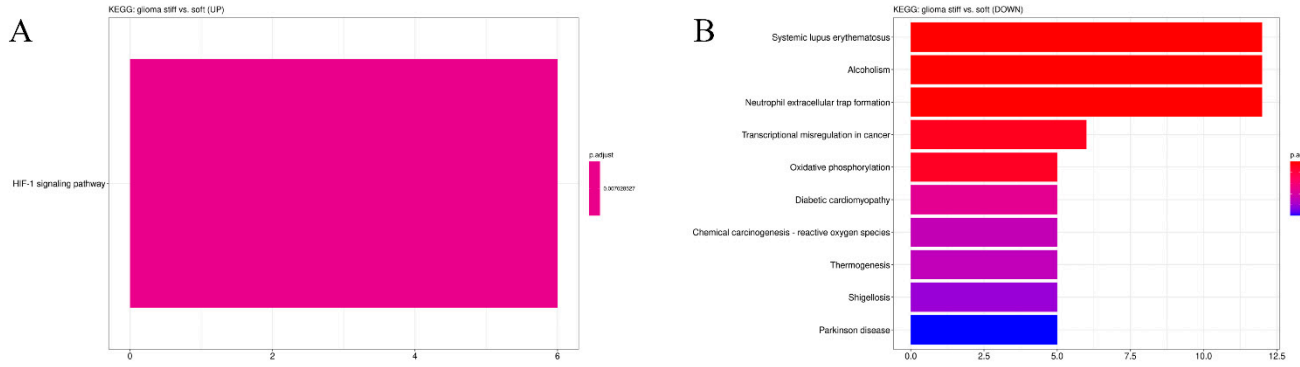

**Figure S1.** Enriched KEGG terms for (A) up-regulated and (B) down-regulated stiffness-dependent genes.

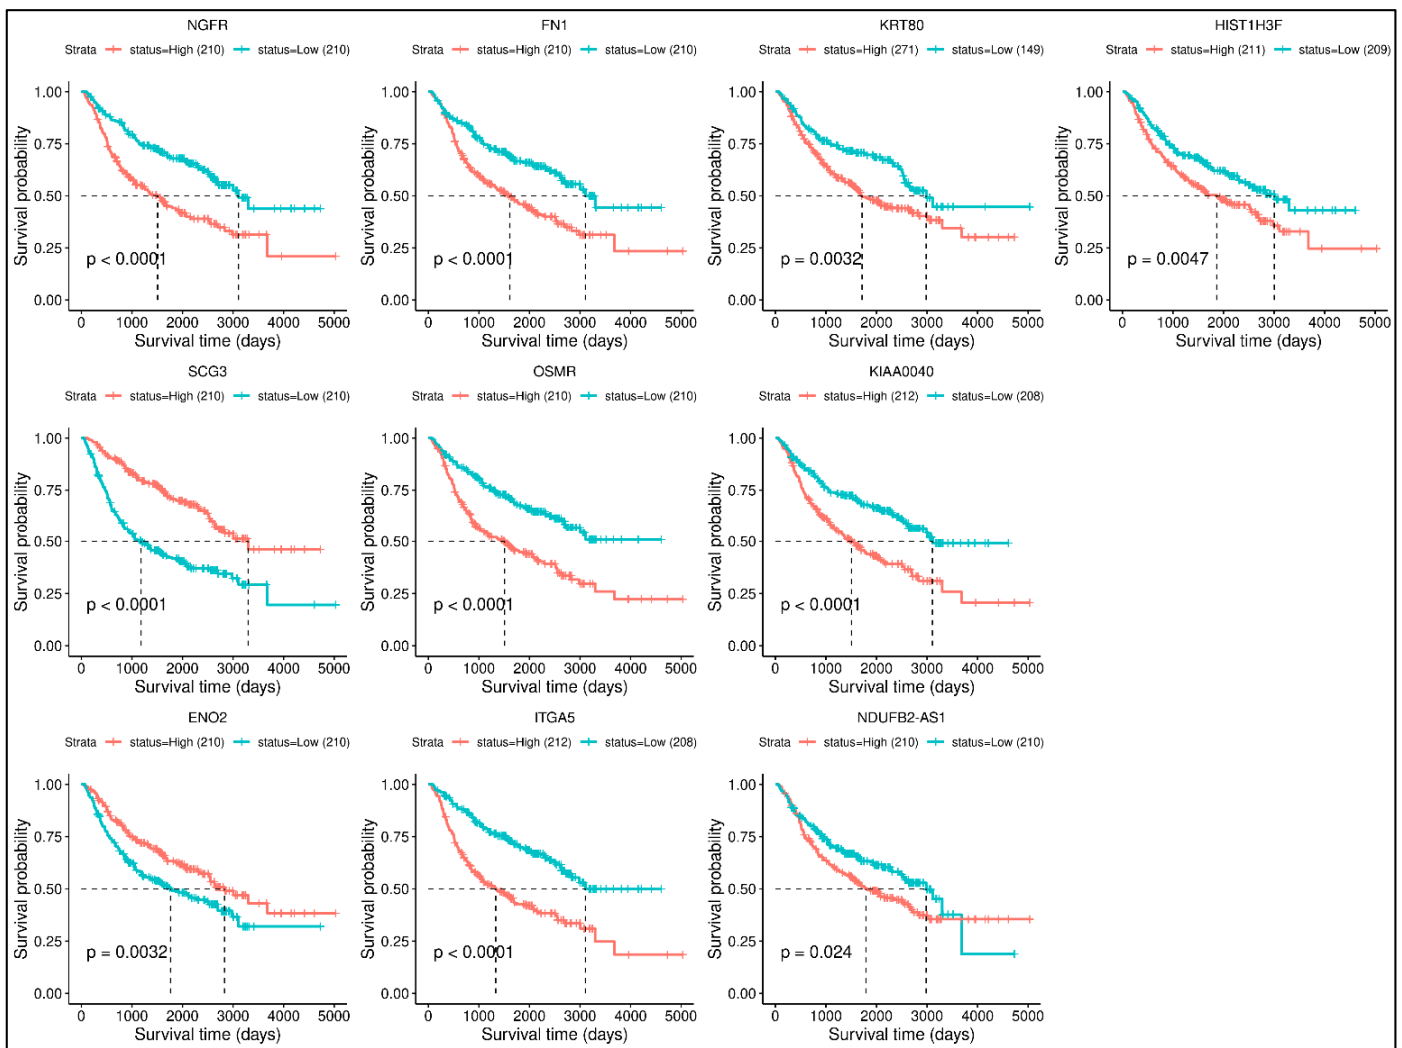

**Figure S2.** Kaplan-Meier curves of stiffness-dependent prognostic genes in CGGA for the common genes in TCGA-LGG and CGGA-LGG.

**Table S1.** List of 190 differentially expressed genes from GSE158097.

| Ensembl ID      | Gene      | LFG<br>(log2 Fold Change) | Adjusted P value | Ensembl ID      | Gene      | LFG<br>(log2 Fold Change) | Adjusted P value |
|-----------------|-----------|---------------------------|------------------|-----------------|-----------|---------------------------|------------------|
| ENSG00000005206 | SPPL2B    | -0.646772                 | 0.0329397        | ENSG00000161638 | ITGA5     | 0.633357                  | 0.00823365       |
| ENSG00000006015 | REX1BD    | -0.897553                 | 0.0319352        | ENSG00000161996 | WDR90     | -0.884095                 | 0.0220473        |
| ENSG00000007062 | PROM1     | 1.00918                   | 0.000094683      | ENSG00000162066 | AMDHD2    | -0.706101                 | 0.0373431        |
| ENSG00000011451 | WIZ       | -0.626875                 | 0.0461849        | ENSG00000162433 | AK4       | 0.636453                  | 0.00470972       |
| ENSG00000012171 | SEMA3B    | -0.836142                 | 0.0444711        | ENSG00000163328 | GPR155    | 0.627754                  | 0.00966038       |
| ENSG00000034677 | RNF19A    | 0.602468                  | 0.00966038       | ENSG00000163565 | IFI16     | 0.677176                  | 0.000970363      |
| ENSG00000041982 | TNC       | 0.603528                  | 0.000801153      | ENSG00000163884 | KLF15     | -0.922529                 | 0.0204121        |
| ENSG00000059804 | SLC2A3    | 0.975258                  | 2.9545E-06       | ENSG00000163947 | ARHGEF3   | 0.601495                  | 0.0190061        |
| ENSG00000061938 | TNK2      | -0.592181                 | 0.0499169        | ENSG00000165804 | ZNF219    | -0.751684                 | 0.0499169        |
| ENSG00000064300 | NGFR      | -0.733425                 | 0.000107599      | ENSG00000166166 | TRMT61A   | -0.892607                 | 0.00821324       |
| ENSG00000075702 | WDR62     | -0.674856                 | 0.00720056       | ENSG00000166803 | PCLAF     | -0.922929                 | 0.0063289        |
| ENSG00000078549 | ADCYAP1R1 | 0.776005                  | 0.00044695       | ENSG00000167306 | MYO5B     | 0.632335                  | 0.00823365       |
| ENSG00000089127 | OAS1      | 1.83111                   | 0.000402199      | ENSG00000167508 | MVD       | -0.699961                 | 0.0295821        |
| ENSG00000100095 | SEZ6L     | 0.68361                   | 0.043634         | ENSG00000167513 | CDT1      | -1.01573                  | 0.00256172       |
| ENSG00000100311 | PDGFB     | -0.662556                 | 0.0342422        | ENSG00000167601 | AXL       | -0.972028                 | 0.000544636      |
| ENSG00000100336 | APOL4     | 1.13379                   | 0.00496137       | ENSG00000167767 | KRT80     | -1.02686                  | 0.0441272        |
| ENSG00000101203 | COL20A1   | -0.621195                 | 0.00087901       | ENSG00000170439 | METTL7B   | 0.814964                  | 0.00966038       |
| ENSG00000103254 | FAM173A   | -0.987981                 | 0.0248465        | ENSG00000170961 | HAS2      | 0.72346                   | 0.011403         |
| ENSG00000104112 | SCG3      | 1.04542                   | 1.38206E-05      | ENSG00000171885 | AQP4      | 1.24014                   | 2.04602E-11      |
| ENSG00000104419 | NDRG1     | 1.37611                   | 8.41E-18         | ENSG00000171951 | SCG2      | 0.799105                  | 0.000106345      |
| ENSG00000104897 | SF3A2     | -0.746335                 | 0.0186489        | ENSG00000172020 | GAP43     | 0.650392                  | 0.000546759      |
| ENSG00000104899 | AMH       | -1.44831                  | 0.000690057      | ENSG00000172366 | MCRIIP2   | -0.934986                 | 0.0316397        |
| ENSG00000105722 | ERF       | -0.657854                 | 0.0188655        | ENSG00000173193 | PARP14    | 0.700247                  | 0.00188932       |
| ENSG00000106009 | BRAT1     | -0.660019                 | 0.047022         | ENSG00000175356 | SCUBE2    | 1.3086                    | 0.0299764        |
| ENSG00000106484 | MEST      | 0.766854                  | 0.0336318        | ENSG00000175426 | PCSK1     | 1.17642                   | 0.0309796        |
| ENSG00000106772 | PRUNE2    | 0.587807                  | 0.00496137       | ENSG00000175756 | AURKAIP1  | -0.684136                 | 0.0188655        |
| ENSG00000107201 | DDX58     | 1.03534                   | 0.000522518      | ENSG00000175899 | A2M       | 0.911345                  | 9.75502E-06      |
| ENSG00000109107 | ALDOC     | 0.890718                  | 0.000094683      | ENSG00000176171 | BNIP3     | 0.760167                  | 7.04252E-05      |
| ENSG00000111674 | ENO2      | 0.683161                  | 0.0060456        | ENSG00000180525 | PRR26     | -0.80197                  | 0.0183821        |
| ENSG00000112715 | VEGFA     | 1.10975                   | 8.96666E-11      | ENSG00000181381 | DDX60L    | 0.840754                  | 0.0237577        |
| ENSG00000114019 | AMOTL2    | -0.769064                 | 0.00235272       | ENSG00000181458 | TMEM45A   | 1.60281                   | 4.79025E-06      |
| ENSG00000114023 | FAM162A   | 0.792392                  | 0.000801153      | ENSG00000181790 | ADGRB1    | -0.691105                 | 0.0121155        |
| ENSG00000114268 | PFKFB4    | 0.841321                  | 0.00966038       | ENSG00000184221 | OLIG1     | -0.587721                 | 0.0351261        |
| ENSG00000114480 | GBE1      | 0.665924                  | 0.0149431        | ENSG00000184357 | HIST1H1B  | -0.676455                 | 2.32003E-05      |
| ENSG00000115414 | FN1       | 1.30602                   | 1.97068E-12      | ENSG00000184500 | PROS1     | 0.724882                  | 0.000924875      |
| ENSG00000115548 | KDM3A     | 0.607155                  | 0.00974789       | ENSG00000184678 | HIST2H2BE | -0.627317                 | 0.00496137       |
| ENSG00000117525 | F3        | 0.617649                  | 0.0149672        | ENSG00000184897 | H1FX      | -0.684417                 | 0.0378878        |
| ENSG00000117643 | MAN1C1    | 0.660578                  | 0.0188655        | ENSG00000185347 | TEDC1     | -1.11134                  | 0.00887821       |

|                 |           |           |             |  |                 |                |           |             |
|-----------------|-----------|-----------|-------------|--|-----------------|----------------|-----------|-------------|
| ENSG00000118785 | SPP1      | 1.13439   | 7.04252E-05 |  | ENSG00000185504 | FAAP100        | -0.707204 | 0.0285508   |
| ENSG00000119917 | IFIT3     | 1.00251   | 0.0152209   |  | ENSG00000185745 | IFIT1          | 1.91285   | 9.25893E-07 |
| ENSG00000119922 | IFIT2     | 0.875816  | 0.031024    |  | ENSG00000186193 | SAPCD2         | -0.710342 | 0.00447371  |
| ENSG00000121039 | RDH10     | 0.729096  | 0.0444711   |  | ENSG00000186470 | BTN3A2         | 0.704416  | 0.0190795   |
| ENSG00000122515 | ZMIZ2     | -0.606148 | 0.0407161   |  | ENSG00000187051 | RPS19BP1       | -0.683297 | 0.0234504   |
| ENSG00000122584 | NXPH1     | 0.612347  | 0.0105021   |  | ENSG00000188566 | NDOR1          | -0.763629 | 0.0342422   |
| ENSG00000122884 | P4HA1     | 0.778702  | 1.05376E-05 |  | ENSG00000196562 | SULF2          | 0.725391  | 8.09843E-05 |
| ENSG00000124635 | HIST1H2BJ | -0.655333 | 0.000107803 |  | ENSG00000196642 | RABL6          | -0.651044 | 0.0193519   |
| ENSG00000125520 | SLC2A4RG  | -0.654379 | 0.0286886   |  | ENSG00000196739 | COL27A1        | -0.70779  | 0.0117649   |
| ENSG00000125534 | PPDPF     | -0.992653 | 0.0183821   |  | ENSG00000196756 | SNHG17         | -0.648988 | 0.00966038  |
| ENSG00000126461 | SCAF1     | -0.693781 | 0.0162332   |  | ENSG00000197136 | PCNX3          | -0.592462 | 0.0412095   |
| ENSG00000126464 | PRR12     | -0.950508 | 0.031786    |  | ENSG00000197153 | HIST1H3J       | -0.842424 | 7.98311E-05 |
| ENSG00000126709 | IFI6      | 1.45198   | 0.000522518 |  | ENSG00000197774 | EME2           | -0.701213 | 0.0248465   |
| ENSG00000128285 | MCHR1     | 1.30221   | 0.0179864   |  | ENSG00000197785 | ATAD3A         | -0.740204 | 0.0226816   |
| ENSG00000129521 | EGLN3     | 1.00929   | 0.00821324  |  | ENSG00000198695 | MT-ND6         | -1.33816  | 2.3507E-06  |
| ENSG00000129911 | KLF16     | -0.858217 | 0.0124712   |  | ENSG00000198727 | MT-CYB         | -0.602791 | 0.0285508   |
| ENSG00000130055 | GDPD2     | 0.784974  | 0.0228472   |  | ENSG00000198753 | PLXNB3         | -0.752783 | 0.0286351   |
| ENSG00000130303 | BST2      | 1.63424   | 0.00518247  |  | ENSG00000198763 | MT-ND2         | -0.99591  | 0.000311015 |
| ENSG00000130332 | LSM7      | -0.705587 | 0.0286442   |  | ENSG00000198888 | MT-ND1         | -0.896945 | 0.000107803 |
| ENSG00000130600 | H19       | 0.771921  | 0.000532065 |  | ENSG00000198947 | DMD            | 0.720227  | 0.0464597   |
| ENSG00000131095 | GFAP      | 0.606222  | 0.000402199 |  | ENSG00000205413 | SAMD9          | 1.47685   | 0.000534556 |
| ENSG00000131584 | ACAP3     | -0.590022 | 0.0318091   |  | ENSG00000210196 | MT-TP          | -0.6785   | 0.0060059   |
| ENSG00000132361 | CLUH      | -0.587625 | 0.0335704   |  | ENSG00000212443 | SNORA53        | -1.05092  | 0.000768059 |
| ENSG00000132561 | MATN2     | 0.614537  | 0.00974789  |  | ENSG00000218891 | ZNF579         | -1.01007  | 0.0226816   |
| ENSG00000133048 | CHI3L1    | 2.19492   | 5.40694E-12 |  | ENSG00000221866 | PLXNA4         | 0.767693  | 0.0221667   |
| ENSG00000133083 | DCLK1     | 0.896189  | 0.00890964  |  | ENSG00000221963 | APOL6          | 1.04225   | 0.000300589 |
| ENSG00000134333 | LDHA      | 0.636074  | 1.38206E-05 |  | ENSG00000224888 | AC138028.2     | -0.955685 | 0.0358656   |
| ENSG00000134815 | DHX34     | -0.631643 | 0.0484454   |  | ENSG00000228253 | MT-ATP8        | -1.43967  | 0.000094683 |
| ENSG00000134853 | PDGFRA    | 0.60206   | 0.00426606  |  | ENSG00000231864 | AL807752.3     | -0.890627 | 0.00110956  |
| ENSG00000134986 | NREP      | 0.690573  | 0.0106397   |  | ENSG00000233822 | HIST1H2BN      | -0.712899 | 0.00143128  |
| ENSG00000135744 | AGT       | 0.963679  | 2.08086E-09 |  | ENSG00000235750 | KIAA0040       | 0.921656  | 0.025231    |
| ENSG00000136295 | TTYH3     | -0.588856 | 0.047022    |  | ENSG00000240889 | NDUFB2-<br>AS1 | -0.93943  | 0.00584206  |
| ENSG00000136378 | ADAMTS7   | -0.784208 | 0.0340533   |  | ENSG00000242802 | AP5Z1          | -0.738564 | 0.0162332   |
| ENSG00000136531 | SCN2A     | 1.20833   | 0.0309856   |  | ENSG00000244731 | C4A            | 1.03002   | 0.0253067   |
| ENSG00000137872 | SEMA6D    | 0.837441  | 0.000180364 |  | ENSG00000246859 | STARD4-<br>AS1 | 0.695775  | 0.0116791   |
| ENSG00000138449 | SLC40A1   | 0.741502  | 0.0136087   |  | ENSG00000248527 | MTATP6P1       | -0.955688 | 0.0381179   |
| ENSG00000138496 | PARP9     | 0.710453  | 0.00145961  |  | ENSG00000260005 | AC027601.1     | -0.900337 | 0.0463808   |
| ENSG00000140450 | ARRDC4    | 0.919084  | 0.00349432  |  | ENSG00000260892 | AC105020.4     | -0.826344 | 0.047022    |
| ENSG00000140983 | RHOT2     | -0.664416 | 0.0150999   |  | ENSG00000263740 | RN7SL4P        | -1.03928  | 0.0285508   |

|                 |            |           |             |  |                 |            |           |             |
|-----------------|------------|-----------|-------------|--|-----------------|------------|-----------|-------------|
| ENSG00000141905 | NFIC       | -0.677552 | 0.0333847   |  | ENSG00000265168 | AC005726.4 | 0.852621  | 0.0356579   |
| ENSG00000142627 | EPHA2      | -0.6152   | 0.0236298   |  | ENSG00000265972 | TXNIP      | 0.722808  | 7.55432E-05 |
| ENSG00000142798 | HSPG2      | -0.702137 | 0.0275291   |  | ENSG00000266074 | BAHCC1     | -0.791246 | 0.0194432   |
| ENSG00000143847 | PPFIA4     | 1.49427   | 0.0183821   |  | ENSG00000272114 | AL136131.3 | 1.19191   | 0.00348904  |
| ENSG00000144481 | TRPM8      | 0.730967  | 0.00177242  |  | ENSG00000274641 | HIST1H2BO  | -0.602497 | 0.00426606  |
| ENSG00000144485 | HES6       | -0.685502 | 0.00274083  |  | ENSG00000274997 | HIST1H2AH  | -0.79715  | 0.000311015 |
| ENSG00000145623 | OSMR       | 0.747924  | 0.00230989  |  | ENSG00000275221 | HIST1H2AK  | -0.916798 | 0.00509724  |
| ENSG00000145730 | PAM        | 0.687095  | 0.000311015 |  | ENSG00000275714 | HIST1H3A   | -0.764232 | 0.0111561   |
| ENSG00000146674 | IGFBP3     | 0.840062  | 5.57655E-06 |  | ENSG00000276043 | UHRF1      | -0.603455 | 0.0152209   |
| ENSG00000147408 | CSGALNACT1 | 0.735025  | 0.00775363  |  | ENSG00000277775 | HIST1H3F   | -0.704576 | 0.000160661 |
| ENSG00000147852 | VLDLR      | 0.770303  | 0.000107803 |  | ENSG00000278463 | HIST1H2AB  | -1.10145  | 5.57655E-06 |
| ENSG00000148053 | NTRK2      | 0.606449  | 0.00566567  |  | ENSG00000278828 | HIST1H3H   | -0.927649 | 0.000107803 |
| ENSG00000148204 | CRB2       | -0.660211 | 0.0275291   |  | ENSG00000281383 | FP671120.4 | -23.1545  | 0.000371136 |
| ENSG00000152256 | PDK1       | 0.98658   | 7.60226E-06 |  | ENSG00000286522 |            | -0.654322 | 0.00396858  |
| ENSG00000152377 | SPOCK1     | 0.606705  | 0.0037757   |  | ENSG00000286670 |            | 0.939373  | 0.00251328  |
| ENSG00000152583 | SPARCL1    | 0.739457  | 0.000107803 |  |                 |            |           |             |
| ENSG00000152952 | PLOD2      | 0.706235  | 0.000246172 |  |                 |            |           |             |
| ENSG00000156860 | FBRS       | -0.664055 | 0.0162332   |  |                 |            |           |             |
| ENSG00000157601 | MX1        | 1.14696   | 0.0154072   |  |                 |            |           |             |
| ENSG00000159200 | RCAN1      | 0.65128   | 0.000137839 |  |                 |            |           |             |
| ENSG00000160949 | TONSL      | -0.912327 | 0.00426606  |  |                 |            |           |             |

**Table S2.** List of 90 and 50 stiffness-dependent DEG from TCGA-GBM (A) and TCGA-LGG (B) respectively.**Table S2 (A.1)**

| Ensembl ID      | Gene       | GSE158097        |                  | TCGA-GBM         |                  |
|-----------------|------------|------------------|------------------|------------------|------------------|
|                 |            | log2 Fold Change | Adjusted P value | log2 Fold Change | Adjusted P value |
| ENSG0000007062  | PROM1      | 1.00918          | 0.000094683      | 1.91365          | 0.00566561       |
| ENSG0000012171  | SEMA3B     | -0.836142        | 0.0444711        | -2.28487         | 1.15816E-06      |
| ENSG0000041982  | TNC        | 0.603528         | 0.000801153      | 3.75386          | 1.76841E-15      |
| ENSG0000059804  | SLC2A3     | 0.975258         | 2.9545E-06       | -1.48535         | 0.00622916       |
| ENSG0000061938  | TNK2       | -0.592181        | 0.0499169        | -1.33052         | 0.00176507       |
| ENSG0000064300  | NGFR       | -0.733425        | 0.000107599      | 1.43204          | 0.0319727        |
| ENSG0000075702  | WDR62      | -0.674856        | 7.20E-03         | 1.60603          | 0.00101011       |
| ENSG0000089127  | OAS1       | 1.83111          | 0.000402199      | 2.63237          | 0.000139346      |
| ENSG00000100336 | APOL4      | 1.13379          | 0.00496137       | 4.47017          | 1.21462E-11      |
| ENSG00000101203 | COL20A1    | -0.621195        | 0.00087901       | 2.34484          | 0.0288603        |
| ENSG00000104112 | SCG3       | 1.04542          | 1.38206E-05      | -1.27661         | 0.0372205        |
| ENSG00000104899 | AMH        | -1.44831         | 0.000690057      | 2.10643          | 0.00507615       |
| ENSG00000106009 | BRAT1      | -0.660019        | 0.047022         | 1.1096           | 5.32625E-06      |
| ENSG00000106484 | MEIS1      | 0.766854         | 0.0336318        | 3.61588          | 2.66752E-11      |
| ENSG00000111674 | ENO2       | 0.683161         | 0.0060456        | -2.32161         | 4.15842E-09      |
| ENSG00000112715 | VEGFA      | 1.10975          | 8.96666E-11      | 2.91819          | 5.57293E-06      |
| ENSG00000114019 | AMOTL2     | -0.769064        | 0.00235272       | -1.19892         | 0.0241933        |
| ENSG00000114268 | PFKFB4     | 0.841321         | 0.00966038       | 1.24297          | 0.00191261       |
| ENSG00000114480 | GBE1       | 0.665924         | 0.0149431        | 1.91626          | 4.86888E-10      |
| ENSG00000115414 | FN1        | 1.30602          | 1.97068E-12      | 3.36834          | 1.02305E-11      |
| ENSG00000118785 | SPP1       | 1.13439          | 7.04252E-05      | 2.46026          | 0.000317876      |
| ENSG00000121039 | RDH10      | 0.729096         | 0.0444711        | 2.99024          | 1.32434E-07      |
| ENSG00000122884 | P4HA1      | 0.778702         | 1.05376E-05      | 1.45361          | 5.42739E-05      |
| ENSG00000124635 | HIST1H2BJ  | -0.655333        | 0.000107803      | 1.80143          | 0.00168718       |
| ENSG00000125520 | SLC2A4RG   | -0.654379        | 0.0286886        | 1.235            | 0.000633322      |
| ENSG00000126461 | SCAF1      | -0.693781        | 0.0162332        | -1.1593          | 9.66259E-07      |
| ENSG00000126464 | PRR12      | -0.950508        | 0.031786         | -1.13231         | 9.71064E-05      |
| ENSG00000126709 | IFI6       | 1.45198          | 0.000522518      | 1.94976          | 0.00595122       |
| ENSG00000129911 | KLF16      | -0.858217        | 0.0124712        | -1.28824         | 7.56172E-07      |
| ENSG00000130055 | GDPD2      | 0.784974         | 0.0228472        | 1.47547          | 0.0136167        |
| ENSG00000130303 | BST2       | 1.63424          | 0.00518247       | 1.96041          | 0.00128518       |
| ENSG00000130332 | LSM7       | -0.705587        | 0.0286442        | 1.61058          | 6.83134E-07      |
| ENSG00000130600 | H19        | 0.771921         | 0.000532065      | 7.05874          | 2.44947E-10      |
| ENSG00000132361 | CLUH       | -0.587625        | 0.0335704        | -1.0072          | 3.70612E-05      |
| ENSG00000132561 | MATN2      | 0.614537         | 0.00974789       | 1.77941          | 0.000025139      |
| ENSG00000133048 | CHIL1      | 2.19492          | 5.40694E-12      | 6.01433          | 5.31618E-12      |
| ENSG00000133083 | DCLK1      | 0.896189         | 0.00890964       | -1.5089          | 0.000716961      |
| ENSG00000136531 | SCN2A      | 1.20833          | 0.0309856        | -4.23698         | 6.3894E-22       |
| ENSG00000142798 | HSPG2      | -0.702137        | 0.0275291        | 2.44458          | 3.38767E-06      |
| ENSG00000143847 | PPFIA4     | 1.49427          | 0.0183821        | -2.85493         | 1.28042E-08      |
| ENSG00000145623 | OSMR       | 0.747924         | 0.00230989       | 2.44804          | 2.62781E-06      |
| ENSG00000147408 | CSGALNACT1 | 0.735025         | 0.00775363       | -1.23712         | 0.00107385       |
| ENSG00000152377 | SPOCK1     | 0.606705         | 0.0037757        | -2.9355          | 7.36039E-06      |
| ENSG00000152952 | PLOD2      | 0.706235         | 0.000246172      | 2.00467          | 1.55029E-06      |
| ENSG00000159200 | RCAN1      | 0.65128          | 0.000137839      | 1.40094          | 0.0170377        |
| ENSG00000160949 | TONSL      | -0.912327        | 0.00426606       | 1.04975          | 0.0209624        |
| ENSG00000161638 | ITGA5      | 0.633357         | 0.00823365       | 2.83003          | 4.29877E-10      |
| ENSG00000161996 | WDR90      | -0.884095        | 0.0220473        | 1.00722          | 0.0320755        |

Table S2 (A.2)

| Ensembl ID      | Gene       | GSE158097        |                  | TCGA-GBM         |                  |
|-----------------|------------|------------------|------------------|------------------|------------------|
|                 |            | log2 Fold Change | Adjusted P value | log2 Fold Change | Adjusted P value |
| ENSG00000163565 | IFI16      | 0.677176         | 0.000970363      | 2.15468          | 1.30512E-07      |
| ENSG00000166803 | PCLAF      | -0.922929        | 0.0063289        | 5.27491          | 1.44488E-29      |
| ENSG00000167508 | MVD        | -0.699961        | 0.0295821        | -1.12392         | 0.000101935      |
| ENSG00000167513 | CDT1       | -1.01573         | 0.00256172       | 2.36812          | 4.61576E-08      |
| ENSG00000170961 | HAS2       | 0.72346          | 0.011403         | 4.01684          | 2.1771E-16       |
| ENSG00000175426 | PCSK1      | 1.17642          | 0.0309796        | -1.95954         | 0.00764624       |
| ENSG00000184357 | HIST1H1B   | -0.676455        | 2.32003E-05      | 3.83134          | 0.000928691      |
| ENSG00000198753 | PLXNB3     | -0.752783        | 0.0286351        | -1.50577         | 0.00182309       |
| ENSG00000205413 | SAMD9      | 1.47685          | 0.000534556      | 2.38797          | 4.38069E-06      |
| ENSG00000235750 | KIAA0040   | 0.921656         | 0.025231         | 3.11643          | 1.56527E-11      |
| ENSG00000240889 | NDUFB2-AS1 | -0.93943         | 0.00584206       | -1.15011         | 6.80269E-08      |
| ENSG00000265972 | TXNIP      | 0.722808         | 7.55432E-05      | 1.69479          | 1.30471E-06      |
| ENSG00000274997 | HIST1H2AH  | -0.79715         | 0.000311015      | 3.65415          | 0.00503172       |
| ENSG00000136378 | ADAMTS7    | -0.784208        | 0.0340533        | 2.67054          | 1.91692E-05      |
| ENSG00000138449 | SLC40A1    | 0.741502         | 0.0136087        | 2.71427          | 2.80338E-08      |
| ENSG00000138496 | PARP9      | 0.710453         | 0.00145961       | 2.21341          | 2.44805E-10      |
| ENSG00000142627 | EPHA2      | -0.6152          | 0.0236298        | 1.35653          | 0.0143867        |
| ENSG00000144481 | TRPM8      | 0.730967         | 0.00177242       | 2.91319          | 0.000182376      |
| ENSG00000144485 | HES6       | -0.685502        | 0.00274083       | 1.93889          | 0.000804928      |
| ENSG00000146674 | IGFBP3     | 0.840062         | 5.57655E-06      | 4.23612          | 2.61601E-09      |
| ENSG00000147852 | VLDLR      | 0.770303         | 0.000107803      | -1.09682         | 0.0383259        |
| ENSG00000163328 | GPR155     | 0.627754         | 0.00966038       | -1.54151         | 7.9758E-08       |
| ENSG00000167767 | KRT80      | -1.02686         | 0.0441272        | 1.84944          | 0.0208665        |
| ENSG00000170439 | METTL7B    | 0.814964         | 0.00966038       | 5.62736          | 4.34366E-16      |
| ENSG00000173193 | PARP14     | 0.700247         | 0.00188932       | 1.44145          | 0.000609722      |
| ENSG00000175356 | SCUBE2     | 1.3086           | 0.0299764        | 2.34378          | 0.000945311      |
| ENSG00000175899 | A2M        | 0.911345         | 9.75502E-06      | 1.82195          | 1.41014E-05      |
| ENSG00000181381 | DDX60L     | 0.840754         | 0.0237577        | 1.56182          | 2.08744E-05      |
| ENSG00000181458 | TMEM45A    | 1.60281          | 4.79025E-06      | 3.57887          | 5.31804E-15      |
| ENSG00000184500 | PROS1      | 0.724882         | 0.000924875      | 2.9709           | 2.54975E-10      |
| ENSG00000186470 | BTN3A2     | 0.704416         | 0.0190795        | 2.81508          | 4.19847E-13      |
| ENSG00000196562 | SULF2      | 0.725391         | 8.09843E-05      | 1.05593          | 0.0258885        |
| ENSG00000197153 | HIST1H3J   | -0.842424        | 7.98311E-05      | 4.00971          | 0.00244374       |
| ENSG00000221866 | PLXNA4     | 0.767693         | 0.0221667        | -1.31161         | 0.0137881        |
| ENSG00000221963 | APOL6      | 1.04225          | 0.000300589      | 1.35531          | 0.00488477       |
| ENSG00000224888 | AC138028.2 | -0.955685        | 0.0358656        | -3.05685         | 3.41393E-13      |
| ENSG00000263740 | RN7SL4P    | -1.03928         | 0.0285508        | 2.53461          | 0.00215092       |
| ENSG00000274641 | HIST1H2BO  | -0.602497        | 0.00426606       | 3.42653          | 0.000180328      |
| ENSG00000276043 | UHRF1      | -0.603455        | 0.0152209        | 4.10898          | 2.75224E-16      |
| ENSG00000277775 | HIST1H3F   | -0.704576        | 0.000160661      | 4.44958          | 0.00128044       |
| ENSG00000278828 | HIST1H3H   | -0.927649        | 0.000107803      | 3.21157          | 3.73464E-07      |
| ENSG00000281383 | FP671120.4 | -23.1545         | 0.000371136      | 1.74985          | 0.00789888       |

Table S2 (B)

| Ensembl ID      | Gene       | GSE158097        |                  | TCGA-LGG         |                  |
|-----------------|------------|------------------|------------------|------------------|------------------|
|                 |            | log2 Fold Change | Adjusted P value | log2 Fold Change | Adjusted P value |
| ENSG0000012171  | SEMA3B     | -0.836142        | 0.0444711        | -1.72758         | 0.00127918       |
| ENSG0000041982  | TNC        | 0.603528         | 0.000801153      | 2.51244          | 0.000621462      |
| ENSG0000059804  | SLC2A3     | 0.975258         | 2.9545E-06       | -2.57532         | 1.21271E-05      |
| ENSG0000078549  | ADCYAP1R1  | 0.776005         | 0.00044695       | 1.94753          | 0.000372184      |
| ENSG00000100336 | APOL4      | 1.13379          | 0.00496137       | 2.39794          | 0.0225778        |
| ENSG00000101203 | COL20A1    | -0.621195        | 0.00087901       | 2.71126          | 0.00415478       |
| ENSG00000104419 | NDRG1      | 1.37611          | 8.41E-18         | -1.52516         | 0.00328809       |
| ENSG00000104899 | AMH        | -1.44831         | 0.000690057      | 2.85754          | 0.000116276      |
| ENSG00000106484 | MEST       | 0.766854         | 0.0336318        | 1.68103          | 0.00322013       |
| ENSG00000111674 | ENO2       | 0.683161         | 0.0060456        | -1.78112         | 9.72547E-05      |
| ENSG00000115414 | FN1        | 1.30602          | 1.97068E-12      | 1.49081          | 0.0193407        |
| ENSG00000129911 | KLF16      | -0.858217        | 0.0124712        | -1.51385         | 5.46723E-06      |
| ENSG00000130332 | LSM7       | -0.705587        | 0.0286442        | 1.00288          | 0.00414396       |
| ENSG00000131095 | GFAP       | 0.606222         | 0.000402199      | 1.66123          | 0.0126838        |
| ENSG00000132561 | MATN2      | 0.614537         | 0.00974789       | 1.6831           | 0.00438854       |
| ENSG00000134333 | LDHA       | 0.636074         | 1.38206E-05      | -1.11258         | 0.0301914        |
| ENSG00000134853 | PDGFRA     | 0.60206          | 0.00426606       | 2.39476          | 0.000862867      |
| ENSG00000136531 | SCN2A      | 1.20833          | 0.0309856        | -2.47066         | 0.000635268      |
| ENSG00000138449 | SLC40A1    | 0.741502         | 0.0136087        | 1.731            | 0.000241023      |
| ENSG00000138496 | PARP9      | 0.710453         | 0.00145961       | 1.26851          | 0.0148706        |
| ENSG00000143847 | PPFIA4     | 1.49427          | 0.0183821        | -2.32            | 0.000244537      |
| ENSG00000144485 | HES6       | -0.685502        | 0.00274083       | 3.39864          | 4.34554E-11      |
| ENSG00000146674 | IGFBP3     | 0.840062         | 5.57655E-06      | 1.93926          | 0.0348448        |
| ENSG00000147852 | VLDLR      | 0.770303         | 0.000107803      | -1.38842         | 0.00509711       |
| ENSG00000152377 | SPOCK1     | 0.606705         | 0.0037757        | -1.28557         | 0.0306853        |
| ENSG00000163565 | IFI16      | 0.677176         | 0.000970363      | 1.42065          | 0.00166114       |
| ENSG00000163884 | KLF15      | -0.922529        | 0.0204121        | 1.48386          | 0.00210614       |
| ENSG00000163947 | ARHGEF3    | 0.601495         | 0.0190061        | -1.10147         | 0.00369954       |
| ENSG00000165804 | ZNF219     | -0.751684        | 0.0499169        | 1.17689          | 0.00237552       |
| ENSG00000166803 | PCLAF      | -0.922929        | 0.0063289        | 3.23985          | 0.000102451      |
| ENSG00000167513 | CDT1       | -1.01573         | 0.00256172       | 1.40396          | 0.0321921        |
| ENSG00000170439 | METTL7B    | 0.814964         | 0.00966038       | 3.09728          | 0.0059871        |
| ENSG00000170961 | HAS2       | 0.72346          | 0.011403         | 2.78792          | 0.000221989      |
| ENSG00000173193 | PARP14     | 0.700247         | 0.00188932       | 1.21676          | 0.0188917        |
| ENSG00000175356 | SCUBE2     | 1.3086           | 0.0299764        | 2.22524          | 0.000933381      |
| ENSG00000175426 | PCSK1      | 1.17642          | 0.0309796        | -2.28704         | 0.026541         |
| ENSG00000175899 | A2M        | 0.911345         | 9.75502E-06      | 1.11809          | 0.0132437        |
| ENSG00000181381 | DDX60L     | 0.840754         | 0.0237577        | 1.09317          | 0.0369805        |
| ENSG00000181458 | TMEM45A    | 1.60281          | 4.79025E-06      | 1.97547          | 6.30569E-05      |
| ENSG00000184221 | OLIG1      | -0.587721        | 0.0351261        | 1.38461          | 0.0111456        |
| ENSG00000184500 | PROS1      | 0.724882         | 0.000924875      | 1.92135          | 0.000588733      |
| ENSG00000186193 | SAPCD2     | -0.710342        | 0.00447371       | 1.71068          | 0.0173937        |
| ENSG00000186470 | BTN3A2     | 0.704416         | 0.0190795        | 2.18715          | 4.39909E-05      |
| ENSG00000196562 | SULF2      | 0.725391         | 8.09843E-05      | 2.20894          | 1.64587E-06      |
| ENSG00000205413 | SAMD9      | 1.47685          | 0.000534556      | 1.403            | 0.0271278        |
| ENSG00000224888 | AC138028.2 | -0.955685        | 0.0358656        | -1.325           | 0.00269788       |
| ENSG00000240889 | NDUFB2-AS1 | -0.93943         | 0.00584206       | -1.38407         | 5.88451E-07      |
| ENSG00000265972 | TXNIP      | 0.722808         | 7.55432E-05      | 2.07805          | 1.13749E-08      |
| ENSG00000276043 | UHRF1      | -0.603455        | 0.0152209        | 3.76239          | 5.66531E-14      |
| ENSG00000281383 | FP671120.4 | -23.1545         | 0.000371136      | -1.92078         | 0.0189995        |

**Table S3.** List of 14 and 116 stiffness-dependent prognostic genes from TCGA-GBM (A) and TCGA-LGG (B).

**Table S3 (A)**

|                 |            | GSE158097        |                  | Survival analysis ofTCGA -GBM<br>(HEG /LEG : high/low expression gene) |                                       |                                       |                                         | Differential expression ofTCGA -GBM |                  |                     |
|-----------------|------------|------------------|------------------|------------------------------------------------------------------------|---------------------------------------|---------------------------------------|-----------------------------------------|-------------------------------------|------------------|---------------------|
| Ensembl ID      | Gene       | log2 Fold Change | Adjusted P value | P value                                                                | HEG<br>Median survival time<br>(days) | LEG<br>Median survival time<br>(days) | Differential<br>survival time<br>(days) | log2 Fold Change                    | Adjusted P value | DEG in<br>TCGA -LGG |
| ENSG00000115414 | FN1        | 1.30602          | 1.97068E-12      | 0.0323191                                                              | 357                                   | 454                                   | -97                                     | 3.36834                             | 1.02305E-11      | Y                   |
| ENSG00000235750 | KIAA0040   | 0.921656         | 0.025231         | 0.0358911                                                              | 357                                   | 448                                   | -91                                     | 3.11643                             | 1.56527E-11      | Y                   |
| ENSG00000161638 | ITGA5      | 0.633357         | 0.00823365       | 0.0146435                                                              | 342                                   | 454                                   | -112                                    | 2.83003                             | 4.29877E-10      | Y                   |
| ENSG00000111674 | ENO2       | 0.683161         | 0.0060456        | 0.0268753                                                              | 329                                   | 455                                   | -126                                    | -2.32161                            | 4.15842E-09      | Y                   |
| ENSG00000240889 | NDUFB2-AS1 | -0.93943         | 0.00584206       | 0.0396937                                                              | 380                                   | 460                                   | -80                                     | -1.15011                            | 6.80269E-08      | Y                   |
| ENSG00000145623 | OSMR       | 0.747924         | 0.00230989       | 0.0245268                                                              | 342                                   | 454                                   | -112                                    | 2.44804                             | 2.62781E-06      | Y                   |
| ENSG00000277775 | HIST1H3F   | -0.704576        | 0.000160661      | 0.0157875                                                              | 384                                   | 505                                   | -121                                    | 4.44958                             | 0.00128044       | Y                   |
| ENSG00000114268 | PFKFB4     | 0.841321         | 0.00966038       | 0.0173723                                                              | 357                                   | 468                                   | -111                                    | 1.24297                             | 0.00191261       | Y                   |
| ENSG00000175426 | PCSK1      | 1.17642          | 0.0309796        | 0.026107                                                               | 360                                   | 454                                   | -94                                     | -1.95954                            | 0.00764624       | Y                   |
| ENSG00000134333 | LDHA       | 0.636074         | 1.38206E-05      | 0.00976214                                                             | 357                                   | 454                                   | -97                                     | 0.999223                            | 0.00772548       | Y                   |
| ENSG00000167767 | KRT80      | -1.02686         | 0.0441272        | 0.0480174                                                              | 360                                   | 454                                   | -94                                     | 1.84944                             | 0.0208665        | Y                   |
| ENSG00000064300 | NGFR       | -0.733425        | 0.000107599      | 0.0421853                                                              | 360                                   | 460                                   | -100                                    | 1.43204                             | 0.0319727        | Y                   |
| ENSG00000104112 | SCG3       | 1.04542          | 1.38206E-05      | 0.0331176                                                              | 455                                   | 384                                   | 71                                      | -1.27661                            | 0.0372205        | Y                   |
| ENSG00000196739 | COL27A1    | -0.70779         | 0.0117649        | 0.0134037                                                              | 360                                   | 480                                   | -120                                    | 0.578598                            | 0.406699         | N                   |



Table S3 (B.1)

|                 |            | GSE158097        |                  | Survival analysis of TCGA <b>-LGG</b><br>(HEG /LEG : high/low expression gene) |                                       |                                       |                                         | Differential expression of TCGA <b>-LGG</b> |                  |                     |
|-----------------|------------|------------------|------------------|--------------------------------------------------------------------------------|---------------------------------------|---------------------------------------|-----------------------------------------|---------------------------------------------|------------------|---------------------|
| Ensembl ID      | Gene       | log2 Fold Change | Adjusted P value | P value                                                                        | HEG<br>Median survival time<br>(days) | LEG<br>Median survival time<br>(days) | Differential<br>survival time<br>(days) | log2 Fold Change                            | Adjusted P value | DEG in<br>TCGA -LGG |
| ENSG00000144481 | TRPM8      | 0.730967         | 0.00177242       | 2.29066E-07                                                                    | 1886                                  | 2988                                  | -1102                                   | 0.472833                                    | 0                | N                   |
| ENSG00000144485 | HES6       | -0.685502        | 0.00274083       | 0.000559427                                                                    | 2875                                  | 1915                                  | 960                                     | 3.39864                                     | 4.34554E-11      | Y                   |
| ENSG00000240889 | NDUFB2-AS1 | -0.93943         | 0.00584206       | 0.000748022                                                                    | 1886                                  | 2988                                  | -1102                                   | -1.38407                                    | 5.88451E-07      | Y                   |
| ENSG00000196562 | SULF2      | 0.725391         | 8.09843E-05      | 2.8241E-10                                                                     | 3571                                  | 1666                                  | 1905                                    | 2.20894                                     | 1.64587E-06      | Y                   |
| ENSG00000129911 | KLF16      | -0.858217        | 0.0124712        | 0.00294733                                                                     | 1933                                  | 2835                                  | -902                                    | -1.51385                                    | 5.46723E-06      | Y                   |
| ENSG00000059804 | SLC2A3     | 0.975258         | 2.9545E-06       | 0.0394378                                                                      | 2235                                  | 2907                                  | -672                                    | -2.57532                                    | 1.21271E-05      | Y                   |
| ENSG00000186470 | BTN3A2     | 0.704416         | 0.0190795        | 8.06566E-05                                                                    | 1666                                  | 2988                                  | -1322                                   | 2.18715                                     | 4.39090E-05      | Y                   |
| ENSG00000111674 | ENO2       | 0.683161         | 0.0060456        | 0.00362915                                                                     | 3200                                  | 2286                                  | 914                                     | -1.78112                                    | 9.72547E-05      | Y                   |
| ENSG00000126461 | SCAF1      | -0.693781        | 0.0162332        | 0.00257733                                                                     | 1915                                  | 3200                                  | -1285                                   | -0.997752                                   | 9.74412E-05      | Y                   |
| ENSG00000166803 | PCFALF     | -0.922929        | 0.0063289        | 7.73025E-06                                                                    | 1666                                  | 2988                                  | -1322                                   | 3.23985                                     | 0.000102451      | Y                   |
| ENSG00000104899 | AMH        | -1.44831         | 0.000690057      | 0.0164782                                                                      | 2835                                  | 2052                                  | 783                                     | 2.85754                                     | 0.000116276      | Y                   |
| ENSG00000170961 | HA52       | 0.72346          | 0.011403         | 0.00850503                                                                     | 2000                                  | 4412                                  | -2412                                   | 2.78792                                     | 0.000221989      | Y                   |
| ENSG00000078549 | ADCYAP1R1  | 0.776005         | 0.00044695       | 0.000354125                                                                    | 2907                                  | 2052                                  | 855                                     | 1.94753                                     | 0.000372184      | Y                   |
| ENSG00000106009 | BRAT1      | -0.660019        | 0.047022         | 0.00181624                                                                     | 1933                                  | 2907                                  | -974                                    | 0.961654                                    | 0.000555578      | Y                   |
| ENSG00000184500 | PROS1      | 0.724882         | 0.000924875      | 0.00110596                                                                     | 2052                                  | 3470                                  | -1418                                   | 1.92135                                     | 0.000588733      | Y                   |
| ENSG00000041982 | TNC        | 0.603528         | 0.000801153      | 7.23167E-07                                                                    | 1886                                  | 4084                                  | -2198                                   | 2.51244                                     | 0.000621462      | Y                   |
| ENSG00000134853 | PDGFRA     | 0.60206          | 0.00426606       | 0.00237715                                                                     | 2875                                  | 1886                                  | 989                                     | 2.39476                                     | 0.000862867      | Y                   |
| ENSG00000012171 | SEM A3B    | -0.836142        | 0.0444711        | 0.000748315                                                                    | 1933                                  | 2875                                  | -942                                    | -1.72758                                    | 0.00127918       | Y                   |
| ENSG00000163565 | IFI16      | 0.677176         | 0.000970363      | 0.000259711                                                                    | 1933                                  | 4068                                  | -2135                                   | 1.42065                                     | 0.00166114       | Y                   |
| ENSG00000163884 | KLF15      | -0.922529        | 0.0204121        | 0.00590621                                                                     | 2907                                  | 1915                                  | 992                                     | 1.48386                                     | 0.00210614       | Y                   |
| ENSG00000165804 | ZNF219     | -0.751684        | 0.0499169        | 0.00387805                                                                     | 2907                                  | 1891                                  | 1016                                    | 1.17689                                     | 0.00237552       | Y                   |
| ENSG00000224888 | AC138028.2 | -0.955685        | 0.0358656        | 0.000641988                                                                    | 2988                                  | 1886                                  | 1102                                    | -1.325                                      | 0.00269788       | Y                   |
| ENSG00000106484 | MEST       | 0.766854         | 0.0336318        | 5.27059E-05                                                                    | 1886                                  | 2907                                  | -1021                                   | 1.68103                                     | 0.00322013       | Y                   |
| ENSG00000132561 | MATN2      | 0.614537         | 0.00974789       | 0.0275691                                                                      | 2052                                  | 2660                                  | -608                                    | 1.6831                                      | 0.00438854       | Y                   |
| ENSG00000170439 | MEITL7B    | 0.814964         | 0.00966038       | 1.12301E-07                                                                    | 1886                                  | 2988                                  | -1102                                   | 3.09728                                     | 0.0059871        | Y                   |
| ENSG00000114480 | GBE1       | 0.665924         | 0.0149431        | 4.31246E-05                                                                    | 1886                                  | 4068                                  | -2182                                   | 0.94131                                     | 0.00721341       | Y                   |
| ENSG00000184221 | OLIG1      | -0.587721        | 0.0351261        | 0.0176381                                                                      | 2988                                  | 2235                                  | 753                                     | 1.38461                                     | 0.0111456        | Y                   |
| ENSG00000131095 | GFAPI      | 0.606222         | 0.000402199      | 0.0227047                                                                      | 2052                                  | 2660                                  | -608                                    | 1.66123                                     | 0.0126838        | Y                   |
| ENSG00000175899 | A2M        | 0.911345         | 9.75502E-06      | 0.00358467                                                                     | 2000                                  | 2907                                  | -907                                    | 1.11809                                     | 0.0132437        | Y                   |
| ENSG00000138496 | PARP9      | 0.710453         | 0.00145961       | 5.06353E-05                                                                    | 1886                                  | 2875                                  | -989                                    | 1.26851                                     | 0.0148706        | Y                   |
| ENSG00000186193 | SAPCD2     | -0.710342        | 0.00447371       | 3.11793E-05                                                                    | 4068                                  | 1891                                  | 2177                                    | 1.71068                                     | 0.0173937        | Y                   |
| ENSG00000173193 | PARP14     | 0.700247         | 0.00188932       | 0.000183426                                                                    | 1915                                  | 2835                                  | -920                                    | 1.21676                                     | 0.0188917        | Y                   |
| ENSG00000115414 | FN1        | 1.30602          | 1.97068E-12      | 0.000120151                                                                    | 2235                                  | 4412                                  | -2177                                   | 1.49081                                     | 0.0193407        | Y                   |
| ENSG00000176171 | BNIP3      | 0.760167         | 7.04252E-05      | 0.00208764                                                                     | 2907                                  | 2000                                  | 907                                     | -0.771611                                   | 0.0199516        | Y                   |
| ENSG00000100336 | APOL4      | 1.13379          | 0.00496137       | 4.92285E-09                                                                    | 1666                                  | 4068                                  | -2402                                   | 2.39794                                     | 0.0225778        | Y                   |
| ENSG00000205413 | SAMD9      | 1.47685          | 0.000534556      | 4.09227E-05                                                                    | 1933                                  | 3571                                  | -1638                                   | 1.403                                       | 0.0271278        | Y                   |
| ENSG00000134333 | LDHA       | 0.636074         | 1.38206E-05      | 0.000297612                                                                    | 1933                                  | 2988                                  | -1055                                   | -1.11258                                    | 0.0301914        | Y                   |
| ENSG00000167513 | CDT1       | -1.01573         | 0.00256172       | 0.0102339                                                                      | 2000                                  | 2835                                  | -835                                    | 1.40396                                     | 0.0321921        | Y                   |
| ENSG00000146674 | IGFBP3     | 0.840062         | 5.57655E-06      | 0.000203205                                                                    | 1933                                  | 3200                                  | -1267                                   | 1.93926                                     | 0.0348448        | Y                   |
| ENSG00000181381 | DDX60L     | 0.840754         | 0.0237577        | 9.7706E-08                                                                     | 1585                                  | 3571                                  | -1986                                   | 1.09317                                     | 0.0369805        | Y                   |
| ENSG00000034677 | RNF19A     | 0.602468         | 0.00966038       | 0.0110573                                                                      | 2052                                  | 3200                                  | -1148                                   | 0.899714                                    | 0.061555         | N                   |
| ENSG00000125534 | PPDPF      | -0.992653        | 0.0183821        | 7.31492E-05                                                                    | 1915                                  | 3200                                  | -1285                                   | -0.694784                                   | 0.0711228        | N                   |
| ENSG00000235750 | KIAA0040   | 0.921656         | 0.025231         | 2.72002E-05                                                                    | 2052                                  | 2988                                  | -936                                    | 1.48346                                     | 0.0732315        | N                   |
| ENSG00000221963 | APOL6      | 1.04225          | 0.000300589      | 0.000107229                                                                    | 1886                                  | 2988                                  | -1102                                   | 0.997879                                    | 0.0747191        | N                   |
| ENSG00000104112 | SCG3       | 1.04542          | 1.38206E-05      | 6.58097E-07                                                                    | 3200                                  | 1585                                  | 1615                                    | 1.0928                                      | 0.0814148        | N                   |
| ENSG00000265168 | AC005726.4 | 0.852621         | 0.0356579        | 0.00163268                                                                     | 3978                                  | 1915                                  | 2063                                    | 2.40546                                     | 0.0853321        | N                   |
| ENSG00000278828 | HIST1H3H   | -0.927649        | 0.000107803      | 2.56457E-08                                                                    | 1666                                  | 4412                                  | -2746                                   | 1.44169                                     | 0.094073         | N                   |
| ENSG00000148053 | NTRK2      | 0.606449         | 0.00566567       | 0.0036152                                                                      | 2875                                  | 1933                                  | 942                                     | 0.89203                                     | 0.102157         | N                   |

Table S3 (B.2)

|                 |           | GSE158097        |                  | Survival analysis of TCGA <b>LGG</b><br>(HEG <b>L</b> EG : high/low expression gene) |                                 |                                 |                                   | Differential expression of TCGA <b>LGG</b> |                  |                        |
|-----------------|-----------|------------------|------------------|--------------------------------------------------------------------------------------|---------------------------------|---------------------------------|-----------------------------------|--------------------------------------------|------------------|------------------------|
| Ensembl ID      | Gene      | log2 Fold Change | Adjusted P value | P value                                                                              | HEG Median survival time (days) | LEG Median survival time (days) | Differential survival time (days) | log2 Fold Change                           | Adjusted P value | DEG in TCGA <b>LGG</b> |
| ENSG00000167306 | MYO5B     | 0.632335         | 0.00823365       | 0.0260502                                                                            | 2282                            | 2835                            | -553                              | -1.28125                                   | 0.104284         | N                      |
| ENSG00000136378 | ADAMTS7   | -0.784208        | 0.0340533        | 0.00271796                                                                           | 1886                            | 2907                            | -1021                             | 1.2701                                     | 0.114024         | N                      |
| ENSG00000121039 | RDH10     | 0.729096         | 0.0444711        | 6.95406E-05                                                                          | 1915                            | 2835                            | -920                              | 1.08209                                    | 0.11632          | N                      |
| ENSG00000130600 | H19       | 0.771921         | 0.000532065      | 0.0221972                                                                            | 2433                            | 2660                            | -227                              | 2.49047                                    | 0.119563         | N                      |
| ENSG00000142798 | HSPG2     | -0.702137        | 0.0275291        | 4.25341E-07                                                                          | 1891                            | 3978                            | -2087                             | 1.19775                                    | 0.154456         | N                      |
| ENSG00000161638 | ITGA5     | 0.633357         | 0.00823365       | 7.69033E-08                                                                          | 1886                            | 4412                            | -2526                             | 0.956005                                   | 0.155919         | N                      |
| ENSG00000089127 | OAS1      | 1.83111          | 0.000402199      | 1.40554E-07                                                                          | 1666                            | 3470                            | -1804                             | 1.2209                                     | 0.158553         | N                      |
| ENSG00000274641 | HIST1H2B0 | -0.602497        | 0.00426606       | 0.00026707                                                                           | 1915                            | 3571                            | -1656                             | 1.61011                                    | 0.158617         | N                      |
| ENSG00000197153 | HIST1H3J  | -0.842424        | 7.98311E-05      | 0.000135855                                                                          | 2052                            | 4412                            | -2360                             | 2.20041                                    | 0.163488         | N                      |
| ENSG00000172020 | GAP43     | 0.650392         | 0.000546759      | 0.0343392                                                                            | 2286                            | 2660                            | -374                              | -1.01809                                   | 0.164105         | N                      |
| ENSG00000152256 | PKD1      | 0.98658          | 7.60226E-06      | 0.00100676                                                                           | 1915                            | 2988                            | -1073                             | -0.617222                                  | 0.164907         | N                      |
| ENSG00000152952 | PLOD2     | 0.706235         | 0.000246172      | 0.000293392                                                                          | 2000                            | 2875                            | -875                              | 0.698601                                   | 0.173069         | N                      |
| ENSG00000114023 | FAM162A   | 0.792392         | 0.000801153      | 0.017731                                                                             | 3571                            | 2000                            | -1571                             | -0.438719                                  | 0.177154         | N                      |
| ENSG00000136295 | TTYH3     | -0.588856        | 0.047022         | 1.21149E-05                                                                          | 1585                            | 2988                            | -1403                             | -0.630852                                  | 0.2001           | N                      |
| ENSG00000161996 | WDR90     | -0.884095        | 0.0220473        | 2.66813E-06                                                                          | 1666                            | 3200                            | -1534                             | 0.615843                                   | 0.209506         | N                      |
| ENSG00000133048 | CHIL1     | 2.19492          | 5.40694E-12      | 9.31232E-08                                                                          | 1886                            | 2988                            | -1102                             | 2.06554                                    | 0.215039         | N                      |
| ENSG00000070602 | PROM1     | 1.00918          | 0.000094683      | 0.0404141                                                                            | 2286                            | 2835                            | -549                              | 0.831525                                   | 0.227249         | N                      |
| ENSG00000140450 | ARRDC4    | 0.919084         | 0.00349432       | 0.0426379                                                                            | 2000                            | 2660                            | -660                              | 0.633648                                   | 0.23291          | N                      |
| ENSG00000244731 | C4A       | 1.03002          | 0.0253067        | 0.0321104                                                                            | 2000                            | 3571                            | -1571                             | 0.982773                                   | 0.239078         | N                      |
| ENSG00000117525 | F3        | 0.617649         | 0.0149672        | 5.81083E-05                                                                          | 1886                            | 2907                            | -1021                             | -0.951815                                  | 0.252124         | N                      |
| ENSG00000061938 | TNK2      | -0.592181        | 0.0499169        | 9.42238E-09                                                                          | 2988                            | 1666                            | 1322                              | 0.623058                                   | 0.259718         | N                      |
| ENSG00000100095 | SEZ6L     | 0.68361          | 0.043634         | 0.000473955                                                                          | 3470                            | 1915                            | -1555                             | 0.853853                                   | 0.275962         | N                      |
| ENSG00000107201 | DDX58     | 1.03534          | 0.000522518      | 0.0422123                                                                            | 2282                            | 2660                            | -378                              | 0.522991                                   | 0.27665          | N                      |
| ENSG00000278463 | HIST1H2AB | -1.10145         | 5.57655E-06      | 0.0124665                                                                            | 2052                            | 4229                            | -2177                             | -1.0887                                    | 0.278977         | N                      |
| ENSG00000152583 | SPARCL1   | 0.739457         | 0.000107803      | 2.09295E-05                                                                          | 2988                            | 1666                            | 1322                              | 0.55579                                    | 0.2844           | N                      |
| ENSG00000160949 | TONSL     | -0.912327        | 0.00426606       | 5.00308E-05                                                                          | 1891                            | 2988                            | -1097                             | 0.52153                                    | 0.321772         | N                      |
| ENSG00000148204 | CRB2      | -0.660211        | 0.0275291        | 0.000586682                                                                          | 1915                            | 3200                            | -1285                             | -0.90228                                   | 0.321912         | N                      |
| ENSG00000122584 | NXPH1     | 0.612347         | 0.0105021        | 0.000724334                                                                          | 2988                            | 1915                            | 1073                              | 0.730222                                   | 0.341857         | N                      |
| ENSG00000005206 | SPPL2B    | -0.646772        | 0.0329397        | 0.000374141                                                                          | 1891                            | 2907                            | -1016                             | 0.372885                                   | 0.364482         | N                      |
| ENSG00000145623 | OSMR      | 0.747924         | 0.00230989       | 2.80937E-07                                                                          | 1915                            | 3470                            | -1555                             | 0.695391                                   | 0.40026          | N                      |
| ENSG00000137872 | SEM6D     | 0.837441         | 0.000180364      | 0.009191                                                                             | 2000                            | 2835                            | -835                              | -0.420611                                  | 0.405807         | N                      |
| ENSG00000130303 | BST2      | 1.63424          | 0.00518247       | 0.000865671                                                                          | 1933                            | 2875                            | -942                              | 0.631655                                   | 0.415275         | N                      |
| ENSG00000188566 | NDOR1     | -0.763629        | 0.0342422        | 0.000159429                                                                          | 1891                            | 3200                            | -1309                             | 0.228606                                   | 0.421333         | N                      |
| ENSG00000109107 | ALDOC     | 0.890718         | 0.000094683      | 4.49708E-08                                                                          | 3978                            | 1585                            | 2393                              | 0.51197                                    | 0.423919         | N                      |
| ENSG00000162433 | AK4       | 0.636453         | 0.00470972       | 0.00870482                                                                           | 2235                            | 2875                            | -640                              | -0.551474                                  | 0.424563         | N                      |
| ENSG00000134815 | DHX34     | -0.631643        | 0.0484454        | 1.92604E-05                                                                          | 1666                            | 3200                            | -1534                             | -0.241709                                  | 0.508105         | N                      |
| ENSG00000126709 | IFI6      | 1.45198          | 0.000522518      | 4.29028E-05                                                                          | 1886                            | 3200                            | -1314                             | 0.635072                                   | 0.519109         | N                      |
| ENSG00000156860 | FBR5      | -0.664055        | 0.0162332        | 0.0428808                                                                            | 2282                            | 2907                            | -625                              | -0.106336                                  | 0.572104         | N                      |
| ENSG00000105722 | ERF       | -0.657854        | 0.0188655        | 4.66531E-08                                                                          | 1585                            | 4084                            | -2499                             | -0.231087                                  | 0.577345         | N                      |
| ENSG00000129521 | EGLN3     | 1.00929          | 0.00821324       | 0.034894                                                                             | 2907                            | 2052                            | 855                               | -0.297855                                  | 0.583541         | N                      |
| ENSG00000141905 | NFIC      | -0.677552        | 0.0333847        | 0.000388601                                                                          | 1933                            | 3200                            | -1267                             | 0.158646                                   | 0.602575         | N                      |
| ENSG00000130055 | GDPD2     | 0.784974         | 0.0228472        | 0.000316852                                                                          | 1915                            | 3571                            | -1656                             | 0.423503                                   | 0.617157         | N                      |
| ENSG00000175756 | AURKAIP1  | -0.684136        | 0.0188655        | 0.0143871                                                                            | 1933                            | 2907                            | -974                              | -0.195606                                  | 0.625878         | N                      |
| ENSG00000184357 | HIST1H1B  | -0.676455        | 2.32003E-05      | 0.000301045                                                                          | 2052                            | 2907                            | -855                              | 0.837001                                   | 0.626866         | N                      |
| ENSG00000117643 | MAN1C1    | 0.660578         | 0.0188655        | 0.0020142                                                                            | 1933                            | 2875                            | -942                              | -0.386939                                  | 0.659172         | N                      |
| ENSG00000145730 | PAM       | 0.687095         | 0.000311015      | 0.00110532                                                                           | 1891                            | 2907                            | -1016                             | -0.222061                                  | 0.663557         | N                      |
| ENSG00000064300 | NGFR      | -0.733425        | 0.000107599      | 0.00640924                                                                           | 2286                            | 2988                            | -702                              | 0.48277                                    | 0.674429         | N                      |
| ENSG00000167601 | AXL       | -0.972028        | 0.000544636      | 0.000825639                                                                          | 2052                            | 4229                            | -2177                             | 0.186011                                   | 0.728931         | N                      |
| ENSG00000181790 | ADGRB1    | -0.691105        | 0.0121155        | 0.0159193                                                                            | 3470                            | 2052                            | 1418                              | -0.292653                                  | 0.729985         | N                      |
| ENSG00000142627 | EPHA2     | -0.6152          | 0.0236298        | 7.37971E-08                                                                          | 1762                            | 3470                            | -1708                             | 0.267333                                   | 0.767398         | N                      |
| ENSG00000184678 | HIST2H2BE | -0.627317        | 0.00496137       | 5.16607E-05                                                                          | 1891                            | 4229                            | -2338                             | -0.179607                                  | 0.784573         | N                      |
| ENSG00000171885 | AQP4      | 1.24014          | 2.04602E-11      | 0.00566804                                                                           | 1886                            | 2835                            | -949                              | 0.245855                                   | 0.787135         | N                      |
| ENSG0000011451  | WIZ       | -0.626875        | 0.0461849        | 0.00150097                                                                           | 1915                            | 3200                            | -1285                             | -0.0737834                                 | 0.797121         | N                      |
| ENSG00000075702 | WDR62     | -0.674856        | 0.00720056       | 4.10978E-08                                                                          | 1547                            | 3470                            | -1923                             | 0.255247                                   | 0.798768         | N                      |
| ENSG00000167508 | MVD       | -0.699961        | 0.0295821        | 0.00462563                                                                           | 4068                            | 2000                            | 2068                              | -0.109406                                  | 0.831354         | N                      |
| ENSG00000197785 | ATAD3A    | -0.740204        | 0.0226816        | 0.000535535                                                                          | 1891                            | 2907                            | -1016                             | 0.07621                                    | 0.867181         | N                      |
| ENSG00000114019 | AMOTL2    | -0.769064        | 0.00235272       | 0.00017331                                                                           | 2907                            | 1891                            | 1016                              | 0.0852622                                  | 0.89426          | N                      |
| ENSG00000157601 | MX1       | 1.14696          | 0.0154072        | 3.87801E-07                                                                          | 1666                            | 3571                            | -1905                             | -0.13126                                   | 0.894501         | N                      |
| ENSG00000124635 | HIST1H2BJ | -0.655333        | 0.000107803      | 1.11824E-10                                                                          | 1547                            | 4084                            | -2537                             | -0.12734                                   | 0.895846         | N                      |
| ENSG00000248527 | MATP6P1   | -0.955688        | 0.0381179        | 0.000701375                                                                          | 3200                            | 2000                            | 1200                              | 0.0717538                                  | 0.913963         | N                      |
| ENSG00000242802 | APSZ1     | -0.738564        | 0.0162332        | 3.52991E-07                                                                          | 1585                            | 3200                            | -1615                             | -0.0349811                                 | 0.919293         | N                      |
| ENSG00000196739 | COL27A1   | -0.70779         | 0.0117649        | 3.59613E-06                                                                          | 1666                            | 2907                            | -1241                             | 0.0942264                                  | 0.92119          | N                      |
| ENSG00000125520 | SLC2A4RG  | -0.654379        | 0.0286886        | 1.43213E-07                                                                          | 1891                            | 2907                            | -1016                             | 0.0467041                                  | 0.937534         | N                      |
| ENSG00000233822 | HIST1H2BN | -0.712899        | 0.00143128       | 0.00328286                                                                           | 1915                            | 3200                            | -1285                             | -0.0466552                                 | 0.948569         | N                      |
| ENSG00000159200 | RCAN1     | 0.65128          | 0.000137839      | 0.0132429                                                                            | 2286                            | 2433                            | -147                              | -0.0367418                                 | 0.955905         | N                      |
| ENSG00000167767 | KRT80     | -1.02686         | 0.0441272        | 0.0028929                                                                            | 1933                            | 2907                            | -974                              | 0.0316043                                  | 0.986448         | N                      |
| ENSG00000118785 | SPP1      | 1.13439          | 7.04252E-05      | 1.26956E-06                                                                          | 1762                            | 3571                            | -1809                             | -0.00864045                                | 0.99401          | N                      |
| ENSG00000112715 | VEGFA     | 1.10975          | 8.96666E-11      | 8.56009E-05                                                                          | 1891                            | 3200                            | -1309                             | 0.00289938                                 | 0.997415         | N                      |

**Table S4.** Summary of the results of survival analysis for four independent cohorts

| Y : p value < 0.05 ; N : p value > 0.05 | TCGA | CGGA_693 | GSE16011 | CGGA_325 |
|-----------------------------------------|------|----------|----------|----------|
| GBM (Glioblastoma)                      | Y    | Y        | Y        | N        |
| A (Astrocytoma)                         | N    | N        | N        | N        |
| O (Oligodendroglioma)                   | Y    | N        | N        | N        |

**Table S5.** Summary of the prognostic genes for GBM or low-grade gliomas in recent studies

| Tumor type                         | Database source | Sample size | Prognostic genes                                | Description of study                                                                  | Reference          |
|------------------------------------|-----------------|-------------|-------------------------------------------------|---------------------------------------------------------------------------------------|--------------------|
| Primary Glioblastoma               | GEO, TCGA       | 955         | IGFBP2, PTPRN, STEAP2, SLC39A10                 | Meta-analysis for predicting survival in primary GBM.                                 | Prasad et al. [60] |
| Glioblastoma/<br>Low grade glioma  | GEO, TCGA       | 1089        | 104 genes; CTSZ, EFEMP2, ITGA5, KDELR2, MDK...  | Identification of survival relevant genes shared between GBM and LGG.                 | Hsu et al. [7]     |
| Low grade glioma                   | TCGA, CGGA      | 615         | WEE1, CRTAC1, SEMA4G                            | Identification of signature in predicting survival of LGG.                            | Xiao et al. [61]   |
| Glioblastoma /<br>Low grade glioma | TCGA, CGGA      | 1311        | 17 genes; PARVB, RAP1B, PIK3CA, PGF, VEGFA...   | Build a risk signature to predict glioma prognosis using ECM-related gene             | Liu et al. [62]    |
| Low grade glioma                   | TCGA            | 514         | 25 genes; HRH3, APLNR, FCER1G, SYK, GNG12...    | Identification of prognostic hub genes associated with tumor microenvironment in LGG. | Ni et al. [63]     |
| Glioblastoma /<br>Low grade glioma | CGGA            | 693         | 15 genes; ABCC3, COL4A1, PDPN, ANXA1, IGFBP2... | To develop a signature associated with the tumor immune microenvironment              | Gong et al. [64]   |
| Glioblastoma /<br>Low grade glioma | GEO, TCGA, CGGA | 1431        | CDK4, HMGB2, WEE1, SMC3, GADD45G                | Construct DNA damage repair genes signature for glioma treatment                      | Wang et al. [11]   |
| Glioblastoma /<br>Low grade glioma | TCGA            | 657         | TAGLN2, PDPN, TIMP1, EMP3                       | Prognosis analysis of signature related to tumor immune microenvironment              | Lin et al. [8]     |
| Glioblastoma /<br>Low grade glioma | GEO, TCGA, CGGA | 956         | FN1, ITGA5, OSMR, NGFR                          | To identify ECM-stiffness related gene signature in glioma                            | This study         |
